# Supplementary material for: Synthesis and highly effective purification of silver nanowires to enhance transmittance at low sheet resistance with simple polyol and scalable selective precipitation method
Source: Royal Society of Chemistry journal article supplement (doi:10.1039/c7ra00238f), 2017-01-01
Supplement: c7ra00238f1.pdf [file c7ra00238f1.pdf]

## Supporting Information

### Synthesis and Highly Effective Purification of Silver Nanowires to Enhance the Transmittance at Low Sheet Resistance with Simple Polyol and Scalable Selective Precipitation Method

Molla Bahiru Gebeyehu, Tolesa Fita Chala, Shao-Yen Chang, Chang-Mou Wu, Jiunn-Yih Lee\*

Department of Materials Science and Engineering, National Taiwan University of  
Science and Technology, Taipei 10607, Taiwan, ROC.

\*Corresponding Author. E-mail: jlee@mail.ntust.edu.tw, Fax: +011-886-2-27376519

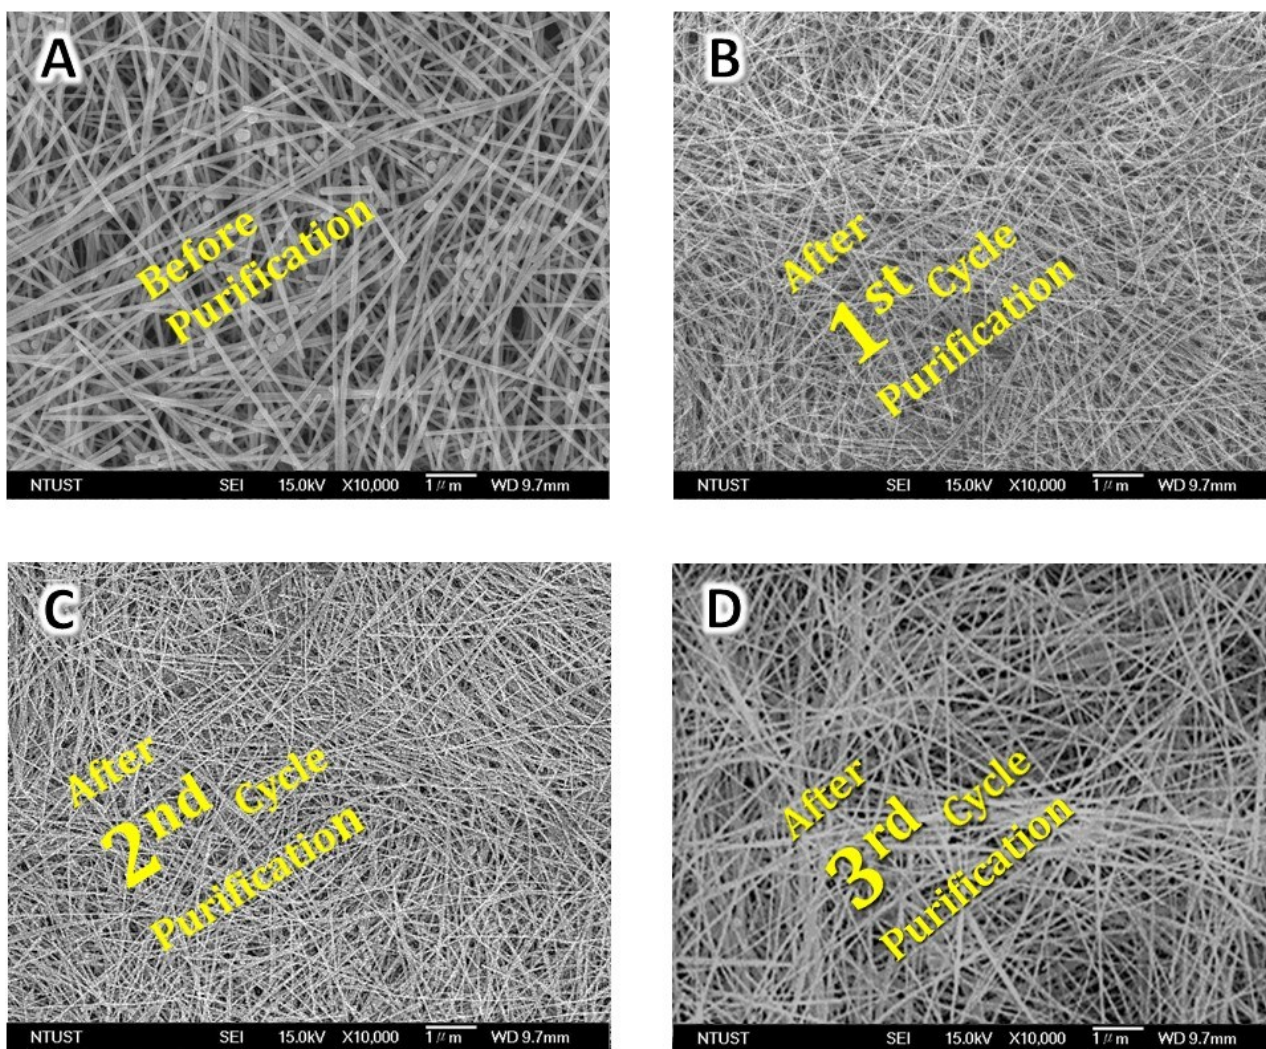

**Fig. S1.** SEM images of Ag nanowires before (A) and after (B) 1<sup>st</sup> Cycle purification (C) 2<sup>nd</sup> Cycle purification (D) 3<sup>rd</sup> Cycle purification

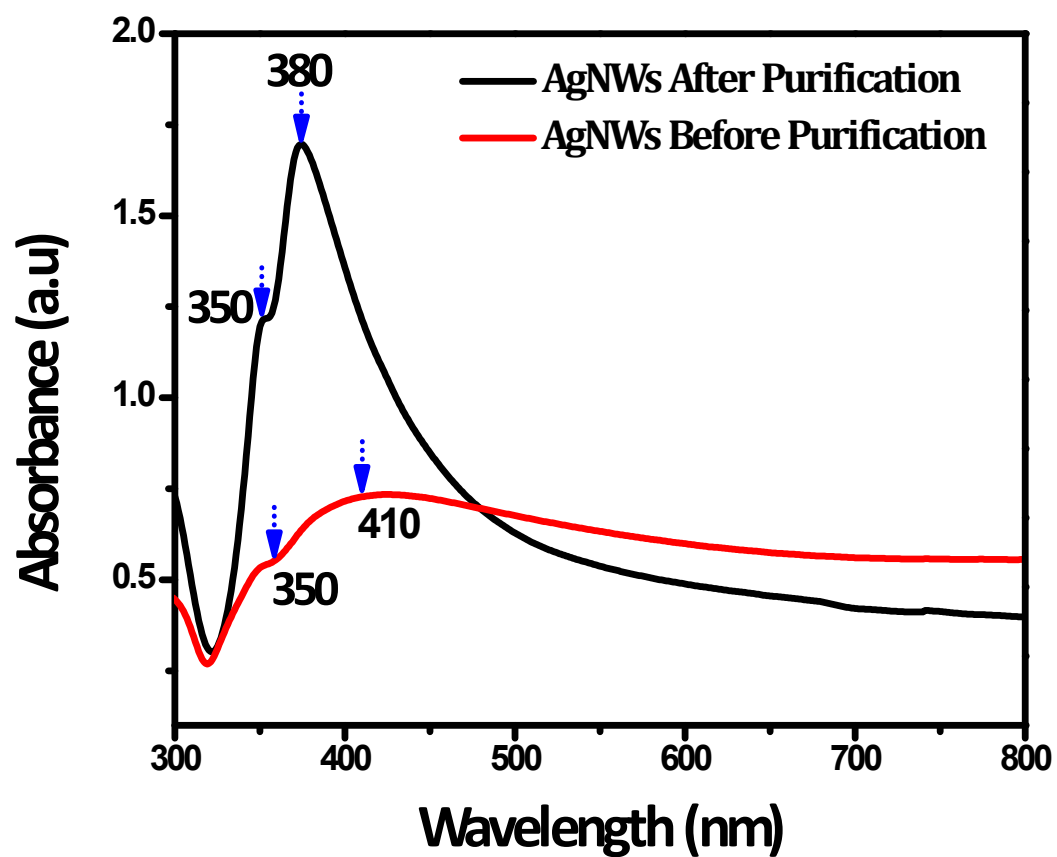

**Fig. S2.** UV-Visible absorption spectrum of AgNWs solution, dispersed in ethanol before and after purification.
